# Supplementary material for: Natural surface emissions dominate anthropogenic emissions contributions to total gaseous mercury at Canadian rural sites
Source: Copernicus journal article supplement (doi:10.5194/acp-25-8591-2025), 2025-08-07
Supplement: Supplementary file 1 [file acp-25-8591-2025-supplement.pdf]

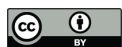

*Supplement of*

## **Natural surface emissions dominate anthropogenic emissions contributions to total gaseous mercury at Canadian rural sites**

**Irene Cheng et al.**

*Correspondence to:* Irene Cheng ([irene.cheng@ec.gc.ca](mailto:irene.cheng@ec.gc.ca))

The copyright of individual parts of the supplement might differ from the article licence.

## Contents

### Sections:

S1 PMF sensitivity runs

S2 PMF residuals analysis

S3 Tekran model B and X measurement intercomparison

### Tables:

Table S1: TGM and ancillary data

Table S2: Descriptive statistics of 24-h average TGM concentrations ( $\text{ng m}^{-3}$ ) at Egbert (EGB), Kejimikujik (KEJ) and Saturna (SAT)

Table S3: Factor profiles (species percentages) for SAT using 5 to 7 factors

Table S4: Factor profiles (species percentages) for EGB using 5 to 7 factors

Table S5: Factor profiles (species percentages) for KEJ using 5 to 7 factors

### Figures:

Figure S1: Comparison of PMF modelled and observed 24-h TGM using regression analysis (left) and time-series analysis (right)

Figure S2: Left - Annual emissions of  $\text{SO}_2$  and Hg from marine transportation reported for British Columbia (ECCC APEI, 2023).  $\text{SO}_2$  ambient concentrations measured at SAT are also plotted. Right – Symbols represent ship traffic along the Strait of Georgia ([http://www.shiptraffic.net/marine-traffic/straits/Strait\\_of\\_Georgia](http://www.shiptraffic.net/marine-traffic/straits/Strait_of_Georgia)).

Figure S3: Hg emission sources within 150 km of SAT. Left: Washington State emissions (USEPA TRI, 2023); right: British Columbia emissions (ECCC NPRI, 2023)

Figure S4: Hg emission sources within 150 km of EGB in Province of Ontario (ECCC NPRI, 2023)

Figure S5: Regional Hg emission sources around SAT, EGB and KEJ. Emissions data for (a) British Columbia, (b) Northwestern U.S., (c) Ontario, (d) Quebec, (e) Nova Scotia, (f) New Brunswick, (g) Northeastern and midwestern U.S. Data sources: ECCC APEI (2023) for Canadian emissions, USEPA TRI (2023) for U.S. emissions.

Figure S6:  $\text{SO}_2$  emissions (a) local, within 150 km of KEJ (ECCC NPRI, 2023) and (b) regional, U.S. northeast and Midwest regions (USEPA NEI, 2023)

Figure S7: Hg emission sources within 150 km of KEJ in Provinces of Nova Scotia and New Brunswick (ECCC NPRI, 2023)

Figure S8: Comparison of PMF modelled and observed 24-h TGM for EGB using regression analysis (left) and time series analysis (right). PMF modelled TGM are based on yearly runs across the time series.

Figure S9: TGM annual source contributions at EGB for (a) single run and (b) yearly runs for 2005-2018. Bar graphs: PMF modelled TGM; red line: mean observed TGM.

Figure S10: Time series of uncertainty scaled residuals for TGM at SAT (top), EGB (middle), and KEJ (bottom) for the final 6-factor solution

Figure S11: Intercomparison between Tekran model X and B measurements for EGB (top) and KEJ/KEB (bottom). Absolute and relative differences for hourly measurements are plotted.

## **Supplement References**

### **S1 PMF sensitivity runs**

The model fit results for the final PMF solution are shown in Fig. S1. The source apportionment results for each of the three sites are stable and reliable. The coefficient of determination ( $r^2$ ) between the PMF modelled and observed TGM concentrations were between 0.43 and 0.75, indicating a good model fit for the variable selection and model parameters chosen in the final run. There is also strong overlap between the modelled and observed time series for 24 h mean TGM, indicating the model adequately captured the daily variability. The most important consideration in deriving the final PMF solution is the justification of the factors and assignment to Hg sources. The sensitivity tests using 5 and 7 factors resulted in factors that were difficult to interpret (Tables S3, S4, and S5). A 5-factor solution results in tracers loading on multiple factors. This leads to a scenario where multiple factors can be assigned to the same source. An ideal PMF solution is one where each factor is assigned to a unique source. A 7-factor solution contains all the results of the 6-factor solution; however, it includes an additional factor that cannot be definitively assigned to a source.

### **S2 PMF residuals analysis**

PMF residuals were analyzed for the final 6-factor solution. The scaled residuals were within the recommended limit of three standard deviations (Fig. S10) and followed a normal distribution (Hopke et al., 2023). This confirms the modeled factors adequately explain the observed TGM data in addition to the good  $R^2$  between modeled and observed TGM concentrations (Fig. S1). The model could not reproduce a few elevated TGM concentrations at KEJ. There was a total of 7 data points (0.22%) out of 3118 in the entire 2005-2016 time series where the scaled residuals were beyond three standard deviations.

### **S3 Tekran model B and X measurement intercomparison**

Hourly TGM differences between Tekran 2537X and 2537B have been assessed and was published along with the quality controlled TGM dataset (ECCC, 2024). The model X and B analyzers at the EGB site operated side by side during Feb-Aug 2017. Model X reported slightly higher TGM than model B with a mean hourly difference of  $0.06 \text{ ng m}^{-3}$  (3.9%). Monthly mean hourly TGM differences were in the range of  $0.02\text{--}0.1 \text{ ng m}^{-3}$  (1.4–6.3%). Model X and model B analyzers were also operated side by side at the same site during Mar-Jul 2018. Model X reported higher TGM than model B with a mean hourly difference of  $0.08 \text{ ng m}^{-3}$  (6.4%). Monthly mean hourly TGM differences were in the range of  $0.07\text{--}0.09 \text{ ng m}^{-3}$  (5.4–7.4%). The difference plots are shown in Fig. S11. Considering the differences were not significant and the concentrations showed similar trends, the valid hourly concentrations from the model X and B analyzers were averaged for the PMF dataset and long-term trends analysis.

TGM was measured concurrently at KEJ and KEB from February to June in 2017. Note that KEJ and KEB sites are not co-located. KEJ was operating a model B analyzer; the site was relocated 3 km south of the original site in Feb 2017 (KEB) and the model X analyzer began operating at the new site. TGM was higher at KEB than at KEJ with a mean hourly difference of  $0.26 \text{ ng m}^{-3}$  (18.8%).

Monthly mean hourly TGM differences were 0.20-0.29 ng m<sup>-3</sup> (16.6-21.5%). These differences may be due to the different analyzer models and/or relocation of the monitoring site; the exact cause is inconclusive. Given the large TGM differences between KEB and KEJ, our decision was that the data from the two sites should not be combined into a single time series. Therefore, the 2017-2018 data at the new site were not used for PMF modeling and long-term trends analysis.

Table S1: TGM and ancillary data

| Measurement                                                                                                                                                                                 | Unit               | Data frequency | Network                                                                                                                                                                            |
|---------------------------------------------------------------------------------------------------------------------------------------------------------------------------------------------|--------------------|----------------|------------------------------------------------------------------------------------------------------------------------------------------------------------------------------------|
| TGM                                                                                                                                                                                         | ng m <sup>-3</sup> | hourly         | ECCC CAPMoN <sup>1</sup>                                                                                                                                                           |
| SO <sub>2</sub> , inorganic ions (Na <sup>+</sup> , K <sup>+</sup> , Cl <sup>-</sup> , Ca <sup>2+</sup> , Mg <sup>2+</sup> , SO <sub>4</sub> <sup>2-</sup> , NH <sub>4</sub> <sup>+</sup> ) | µg m <sup>-3</sup> | 24-h           | ECCC CAPMoN <sup>2</sup>                                                                                                                                                           |
| CO                                                                                                                                                                                          | ppm                | hourly         | ECCC National Air Pollution Surveillance (NAPS) program <sup>3</sup> , ECCC Canadian Greenhouse Gas Measurement program <sup>4</sup> , USEPA Air Quality System (AQS) <sup>5</sup> |
| Total carbon                                                                                                                                                                                | µg m <sup>-3</sup> | 1-in-3 day     | Interagency Monitoring of Protected Visual Environments (IMPROVE) <sup>6</sup>                                                                                                     |
| Air temperature                                                                                                                                                                             | °C                 | hourly         | ECCC Historical Climate Data <sup>7</sup>                                                                                                                                          |

<sup>1</sup>Environment and Climate Change Canada (ECCC): Total Gaseous Mercury (TGM), Government of Canada Open Government Portal [dataset], <https://doi.org/10.18164/e1df5764-1eec-4a9f-9c03-f515b396b717>, 2025.

<sup>2</sup>Environment and Climate Change Canada (ECCC): Major Ions and Acidifying Gases, Government of Canada Open Government Portal [dataset], <https://doi.org/10.18164/e73c7f47-df9c-4877-923c-20e09db28176>, 2025.

<sup>3</sup>Environment and Climate Change Canada (ECCC): National Air Pollution Surveillance (NAPS) Program, Government of Canada Open Government Portal [dataset], <https://data-donnees.az.ec.gc.ca/data/air/monitor/national-air-pollution-surveillance-naps-program/>, 2025.

<sup>4</sup>Worthy, D.: Atmospheric CO at Egbert, Environment and Climate Change Canada (ECCC) Canadian Greenhouse Gas Measurement program, World Data Centre for Greenhouse Gases [dataset], <https://gaw.kishou.go.jp/>, 2025.

<sup>5</sup>United States Environmental Protection Agency (USEPA): Hourly CO, Air Quality System [dataset], <https://www.epa.gov/aqs>, 2025.

<sup>6</sup>Interagency Monitoring of Protected Visual Environments (IMPROVE): Total Carbon, Federal Land Manager Environmental Database [dataset], <https://vista.cira.colostate.edu/Improve/improve-data/>, 2025.

<sup>7</sup>Environment and Climate Change Canada (ECCC): Historical Climate Data, Government of Canada [dataset], <https://climate.weather.gc.ca/>, 2025.

Table S2: Descriptive statistics of 24-h average TGM concentrations (ng m<sup>-3</sup>) at Egbert (EGB), Kejimikujik (KEJ) and Saturna (SAT). P denotes percentile.

| Site | Year | N   | Mean | Median | StdDev | P5   | P25  | P75  | P95  | Min  | Max  |
|------|------|-----|------|--------|--------|------|------|------|------|------|------|
| EGB  | 2005 | 344 | 1.60 | 1.57   | 0.21   | 1.33 | 1.45 | 1.66 | 2.05 | 1.19 | 2.53 |
| EGB  | 2006 | 335 | 1.64 | 1.63   | 0.18   | 1.36 | 1.52 | 1.75 | 1.95 | 1.25 | 2.30 |
| EGB  | 2007 | 301 | 1.54 | 1.55   | 0.20   | 1.19 | 1.41 | 1.66 | 1.85 | 1.08 | 2.36 |
| EGB  | 2008 | 345 | 1.46 | 1.45   | 0.14   | 1.23 | 1.36 | 1.56 | 1.68 | 1.10 | 1.85 |
| EGB  | 2009 | 358 | 1.41 | 1.43   | 0.15   | 1.14 | 1.30 | 1.51 | 1.62 | 0.92 | 1.76 |
| EGB  | 2010 | 340 | 1.39 | 1.39   | 0.19   | 1.09 | 1.25 | 1.53 | 1.69 | 0.97 | 1.88 |
| EGB  | 2011 | 104 | 1.27 | 1.25   | 0.16   | 1.06 | 1.17 | 1.37 | 1.57 | 0.97 | 1.84 |
| EGB  | 2012 | 272 | 1.19 | 1.16   | 0.15   | 1.00 | 1.11 | 1.27 | 1.47 | 0.92 | 1.81 |
| EGB  | 2013 | 305 | 1.09 | 1.06   | 0.16   | 0.87 | 0.97 | 1.17 | 1.35 | 0.80 | 1.68 |
| EGB  | 2014 | 341 | 1.28 | 1.31   | 0.23   | 0.90 | 1.06 | 1.46 | 1.60 | 0.84 | 1.80 |
| EGB  | 2015 | 344 | 1.30 | 1.32   | 0.14   | 1.06 | 1.20 | 1.41 | 1.52 | 0.96 | 1.70 |
| EGB  | 2016 | 356 | 1.28 | 1.28   | 0.16   | 1.03 | 1.17 | 1.41 | 1.52 | 0.82 | 1.69 |
| EGB  | 2017 | 386 | 1.36 | 1.37   | 0.16   | 1.09 | 1.23 | 1.49 | 1.58 | 1.00 | 1.77 |
| EGB  | 2018 | 485 | 1.25 | 1.25   | 0.13   | 1.05 | 1.17 | 1.34 | 1.44 | 0.85 | 1.75 |
| KEJ  | 2005 | 332 | 1.73 | 1.53   | 0.75   | 1.12 | 1.32 | 1.82 | 3.19 | 0.99 | 6.87 |
| KEJ  | 2006 | 342 | 1.10 | 1.09   | 0.21   | 0.79 | 0.93 | 1.28 | 1.43 | 0.65 | 1.62 |
| KEJ  | 2007 | 312 | 1.16 | 1.15   | 0.15   | 0.94 | 1.05 | 1.27 | 1.40 | 0.71 | 1.52 |
| KEJ  | 2008 | 307 | 1.32 | 1.32   | 0.16   | 1.06 | 1.20 | 1.44 | 1.58 | 0.95 | 1.72 |
| KEJ  | 2009 | 341 | 1.27 | 1.27   | 0.17   | 1.01 | 1.15 | 1.40 | 1.48 | 0.83 | 2.38 |
| KEJ  | 2010 | 354 | 1.34 | 1.36   | 0.15   | 1.09 | 1.23 | 1.44 | 1.57 | 0.84 | 1.79 |
| KEJ  | 2011 | 346 | 1.37 | 1.41   | 0.17   | 1.05 | 1.24 | 1.50 | 1.57 | 0.97 | 1.62 |
| KEJ  | 2012 | 349 | 1.36 | 1.37   | 0.16   | 1.10 | 1.23 | 1.50 | 1.61 | 0.98 | 1.67 |
| KEJ  | 2013 | 345 | 1.30 | 1.33   | 0.16   | 1.01 | 1.19 | 1.44 | 1.51 | 0.79 | 1.67 |
| KEJ  | 2014 | 336 | 1.30 | 1.30   | 0.16   | 1.02 | 1.18 | 1.44 | 1.53 | 0.91 | 1.61 |
| KEJ  | 2015 | 350 | 1.19 | 1.21   | 0.16   | 0.91 | 1.06 | 1.33 | 1.39 | 0.74 | 1.53 |
| KEJ  | 2016 | 312 | 1.14 | 1.12   | 0.16   | 0.91 | 1.01 | 1.28 | 1.38 | 0.82 | 1.50 |
| KEJ  | 2017 | 140 | 1.17 | 1.21   | 0.11   | 0.92 | 1.12 | 1.25 | 1.28 | 0.83 | 1.34 |
| SAT  | 2009 | 274 | 1.36 | 1.35   | 0.21   | 1.06 | 1.20 | 1.52 | 1.73 | 0.94 | 2.01 |
| SAT  | 2010 | 266 | 1.50 | 1.51   | 0.17   | 1.24 | 1.39 | 1.61 | 1.75 | 1.14 | 2.53 |
| SAT  | 2011 | 302 | 1.35 | 1.36   | 0.13   | 1.15 | 1.25 | 1.43 | 1.55 | 0.83 | 1.75 |
| SAT  | 2012 | 334 | 1.22 | 1.24   | 0.12   | 1.01 | 1.14 | 1.31 | 1.40 | 0.91 | 1.54 |
| SAT  | 2013 | 287 | 1.33 | 1.33   | 0.12   | 1.13 | 1.25 | 1.43 | 1.51 | 0.90 | 1.61 |
| SAT  | 2014 | 333 | 1.26 | 1.27   | 0.10   | 1.10 | 1.20 | 1.33 | 1.41 | 1.00 | 1.53 |
| SAT  | 2015 | 263 | 1.16 | 1.16   | 0.11   | 0.99 | 1.09 | 1.22 | 1.31 | 0.76 | 1.61 |
| SAT  | 2016 | 153 | 1.37 | 1.38   | 0.07   | 1.23 | 1.33 | 1.42 | 1.49 | 1.18 | 1.57 |
| SAT  | 2018 | 314 | 1.38 | 1.38   | 0.11   | 1.19 | 1.32 | 1.44 | 1.54 | 1.08 | 1.97 |

Table S3: Factor profiles (species percentages) for SAT using 5 to 7 factors. In the 5 factor sensitivity run, two factors can be assigned to secondary sulfate; aged sea-salt factor was not extracted.

| <b>5 factor sensitivity run</b> | Fresh sea-salt | GEM re-emissions/biomass burning | Sulfate | Local combustion or sulfate (no Hg) | Hg pool |
|---------------------------------|----------------|----------------------------------|---------|-------------------------------------|---------|
| SO4                             | 4.26           | 9.55                             | 70.93   | 15.26                               | 0.00    |
| NH4                             | 0.00           | 0.00                             | 49.48   | 40.33                               | 10.18   |
| Cl                              | 93.88          | 0.00                             | 0.00    | 1.30                                | 4.81    |
| Ca                              | 37.17          | 31.21                            | 12.45   | 14.56                               | 4.61    |
| Mg                              | 79.07          | 11.38                            | 9.55    | 0.00                                | 0.00    |
| Na                              | 82.41          | 6.13                             | 9.93    | 0.68                                | 0.85    |
| K                               | 41.75          | 15.07                            | 16.26   | 12.04                               | 14.88   |
| SO2                             | 5.65           | 3.49                             | 0.00    | 90.86                               | 0.00    |
| TGM                             | 7.86           | 31.92                            | 10.99   | 0.00                                | 49.23   |
| Temperature                     | 0.00           | 100.00                           | 0.00    | 0.00                                | 0.00    |
| CO                              | 3.59           | 16.26                            | 9.59    | 13.78                               | 56.78   |
| Total carbon                    | 0.00           | 51.35                            | 18.35   | 8.75                                | 21.55   |

| <b>6 factor final run</b> | GEM re-emissions/biomass burning | Fresh sea-salt | Sulfate (no Hg) | Local combustion | Hg pool | Aged sea-salt |
|---------------------------|----------------------------------|----------------|-----------------|------------------|---------|---------------|
| SO4                       | 0.00                             | 0.00           | 31.30           | 0.00             | 0.00    | 68.70         |
| NH4                       | 0.00                             | 0.00           | 73.09           | 5.00             | 8.97    | 12.94         |
| Cl                        | 0.00                             | 95.72          | 3.00            | 1.28             | 0.00    | 0.00          |
| Ca                        | 24.35                            | 32.49          | 4.46            | 14.43            | 5.31    | 18.96         |
| Mg                        | 4.42                             | 74.59          | 0.00            | 0.00             | 0.00    | 20.98         |
| Na                        | 0.00                             | 77.11          | 0.00            | 1.61             | 0.59    | 20.70         |
| K                         | 13.81                            | 40.26          | 12.45           | 6.56             | 13.80   | 13.12         |
| SO2                       | 6.01                             | 0.00           | 0.00            | 87.69            | 0.00    | 6.30          |
| TGM                       | 29.64                            | 6.33           | 0.00            | 3.32             | 50.35   | 10.36         |
| Temperature               | 100.00                           | 0.00           | 0.00            | 0.00             | 0.00    | 0.00          |
| CO                        | 17.87                            | 3.63           | 11.66           | 11.44            | 55.40   | 0.00          |
| Total carbon              | 53.16                            | 0.00           | 18.97           | 0.00             | 20.57   | 7.30          |

| <b>7 factor sensitivity run</b> | Local combustion (no Hg) | Aged sea-salt | GEM re-emissions/biomass burning | ?     | Hg pool | Sulfate (no Hg) | Fresh sea-salt |
|---------------------------------|--------------------------|---------------|----------------------------------|-------|---------|-----------------|----------------|
| SO4                             | 0.00                     | 59.26         | 6.89                             | 0.00  | 0.00    | 33.85           | 0.00           |
| NH4                             | 4.68                     | 0.00          | 0.00                             | 11.11 | 8.66    | 74.60           | 0.96           |
| Cl                              | 1.72                     | 0.00          | 0.00                             | 0.00  | 1.41    | 2.85            | 94.02          |
| Ca                              | 12.78                    | 17.11         | 11.71                            | 25.18 | 1.43    | 1.71            | 30.08          |
| Mg                              | 0.00                     | 20.11         | 3.83                             | 3.62  | 0.00    | 0.00            | 72.44          |
| Na                              | 1.51                     | 19.65         | 0.00                             | 3.05  | 0.86    | 0.00            | 74.92          |



|              |       |       |        |       |       |      |       |
|--------------|-------|-------|--------|-------|-------|------|-------|
| K            | 5.48  | 11.29 | 2.99   | 20.86 | 12.71 | 9.68 | 36.99 |
| SO2          | 87.00 | 5.52  | 6.77   | 0.70  | 0.00  | 0.00 | 0.00  |
| TGM          | 0.00  | 11.66 | 31.83  | 0.00  | 53.79 | 0.00 | 2.73  |
| Temperature  | 0.00  | 0.00  | 100.00 | 0.00  | 0.00  | 0.00 | 0.00  |
| CO           | 8.16  | 0.00  | 12.86  | 11.94 | 57.44 | 9.60 | 0.00  |
| Total carbon | 0.05  | 0.00  | 0.00   | 90.87 | 0.00  | 9.09 | 0.00  |

Table S4: Factor profiles (species percentages) for EGB using 5 to 7 factors. In the 5 factor sensitivity run, two factors can be assigned to local combustion, secondary sulfate, and crustal/soil emissions.

| <b>5 factor sensitivity run</b> | Road salt | Hg pool or sulfate | Local combustion or sulfate (no Hg) | Crustal/soil or local combustion | GEM re-emissions/biomass burning or crustal/soil |
|---------------------------------|-----------|--------------------|-------------------------------------|----------------------------------|--------------------------------------------------|
| SO4                             | 0.11      | 19.48              | 70.51                               | 3.72                             | 6.19                                             |
| NH4                             | 0.00      | 19.07              | 76.11                               | 0.00                             | 4.83                                             |
| Cl                              | 85.78     | 9.84               | 0.67                                | 3.71                             | 0.00                                             |
| Ca                              | 3.63      | 0.00               | 0.05                                | 79.65                            | 16.68                                            |
| Mg                              | 4.76      | 1.89               | 0.00                                | 75.67                            | 17.68                                            |
| Na                              | 81.13     | 11.12              | 1.78                                | 5.23                             | 0.75                                             |
| K                               | 4.27      | 17.60              | 29.76                               | 9.96                             | 38.41                                            |
| SO2                             | 0.00      | 0.00               | 71.59                               | 28.41                            | 0.00                                             |
| TGM                             | 0.86      | 80.69              | 0.00                                | 16.75                            | 1.70                                             |
| Temperature                     | 0.00      | 0.00               | 0.00                                | 0.00                             | 100.00                                           |
| CO                              | 1.50      | 79.52              | 1.61                                | 17.37                            | 0.00                                             |
| Total carbon                    | 2.09      | 46.43              | 9.30                                | 4.45                             | 37.74                                            |

| <b>6 factor final run</b> | Road salt | GEM re-emissions/biomass burning | Sulfate (no Hg) | Hg pool | Local combustion | Crustal/soil |
|---------------------------|-----------|----------------------------------|-----------------|---------|------------------|--------------|
| SO4                       | 0.76      | 0.97                             | 78.12           | 9.01    | 5.72             | 5.42         |
| NH4                       | 1.02      | 0.01                             | 84.36           | 9.10    | 4.38             | 1.13         |
| Cl                        | 88.15     | 4.59                             | 0.03            | 4.55    | 0.44             | 2.23         |
| Ca                        | 2.25      | 0.00                             | 2.25            | 3.44    | 0.00             | 92.05        |
| Mg                        | 3.16      | 3.31                             | 0.54            | 4.82    | 1.82             | 86.36        |
| Na                        | 83.20     | 5.22                             | 0.93            | 5.69    | 1.38             | 3.57         |
| K                         | 4.39      | 32.62                            | 36.41           | 9.48    | 3.49             | 13.61        |
| SO2                       | 0.73      | 5.42                             | 0.07            | 3.51    | 88.38            | 1.91         |
| TGM                       | 2.42      | 23.89                            | 0.00            | 67.19   | 1.59             | 4.91         |
| Temperature               | 0.00      | 100.00                           | 0.00            | 0.00    | 0.00             | 0.00         |
| CO                        | 3.06      | 20.89                            | 2.82            | 65.83   | 1.24             | 6.16         |
| Total carbon              | 3.08      | 46.74                            | 14.03           | 36.15   | 0.00             | 0.00         |

| <b>7 factor sensitivity run</b> | Sulfate (no Hg) | ?     | Crustal/soil | GEM re-emissions/biomass burning | Road salt (no Hg) | Local combustion | Hg pool |
|---------------------------------|-----------------|-------|--------------|----------------------------------|-------------------|------------------|---------|
| SO4                             | 75.13           | 0.00  | 9.72         | 0.00                             | 1.16              | 3.80             | 10.19   |
| NH4                             | 71.73           | 24.21 | 0.00         | 0.00                             | 0.00              | 4.06             | 0.00    |
| Cl                              | 0.00            | 28.88 | 0.00         | 0.00                             | 71.12             | 0.00             | 0.00    |
| Ca                              | 0.58            | 5.04  | 91.63        | 2.75                             | 0.00              | 0.00             | 0.00    |
| Mg                              | 0.00            | 3.35  | 86.06        | 5.00                             | 1.24              | 1.67             | 2.68    |
| Na                              | 2.14            | 0.00  | 6.06         | 0.42                             | 77.45             | 0.42             | 13.51   |
| K                               | 21.15           | 28.66 | 9.92         | 33.98                            | 1.10              | 4.72             | 0.47    |
| SO2                             | 0.00            | 3.15  | 2.37         | 2.69                             | 0.08              | 85.52            | 6.20    |
| TGM                             | 0.00            | 13.63 | 5.15         | 6.02                             | 0.00              | 0.56             | 74.64   |
| Temperature                     | 0.00            | 0.00  | 0.00         | 100.00                           | 0.00              | 0.00             | 0.00    |
| CO                              | 1.86            | 16.00 | 5.99         | 4.20                             | 0.36              | 0.16             | 71.45   |
| Total carbon                    | 10.93           | 11.46 | 0.00         | 38.11                            | 1.28              | 0.00             | 38.22   |

Table S5: Factor profiles (species percentages) for KEJ using 5 to 7 factors. In the 5 factor sensitivity run, aged sea-salt factor was not extracted.

| <b>5 factor sensitivity run</b> | Fresh sea-salt | Sulfate (no Hg) | GEM re-emissions/biomass burning | Hg pool | Local combustion (no Hg) |
|---------------------------------|----------------|-----------------|----------------------------------|---------|--------------------------|
| SO4                             | 1.52           | 86.17           | 8.79                             | 0.92    | 2.61                     |
| NH4                             | 0.00           | 88.17           | 11.83                            | 0.00    | 0.00                     |
| Cl                              | 99.74          | 0.00            | 0.26                             | 0.00    | 0.00                     |
| Ca                              | 36.94          | 35.48           | 14.92                            | 8.54    | 4.12                     |
| Mg                              | 79.76          | 13.05           | 3.92                             | 2.86    | 0.41                     |
| Na                              | 85.92          | 8.46            | 0.00                             | 5.27    | 0.36                     |
| K                               | 36.10          | 31.64           | 25.57                            | 4.79    | 1.89                     |
| SO2                             | 1.34           | 0.00            | 4.97                             | 3.14    | 90.55                    |
| TGM                             | 6.64           | 0.00            | 27.35                            | 66.02   | 0.00                     |
| Temperature                     | 0.00           | 0.00            | 100.00                           | 0.00    | 0.00                     |
| CO                              | 4.68           | 3.95            | 28.17                            | 62.26   | 0.95                     |
| Total carbon                    | 0.00           | 5.48            | 46.72                            | 42.42   | 5.39                     |

| <b>6 factor final run</b> | Fresh sea-salt | Local combustion (no Hg) | Sulfate (no Hg) | GEM re-emissions/biomass burning (no Hg) | Hg pool | Aged sea-salt |
|---------------------------|----------------|--------------------------|-----------------|------------------------------------------|---------|---------------|
| SO4                       | 0.00           | 0.84                     | 74.61           | 0.00                                     | 0.99    | 23.56         |
| NH4                       | 3.02           | 0.17                     | 93.63           | 3.18                                     | 0.00    | 0.00          |
| Cl                        | 94.46          | 0.27                     | 0.75            | 0.00                                     | 4.51    | 0.00          |
| Ca                        | 29.46          | 3.38                     | 22.61           | 9.70                                     | 8.85    | 26.00         |

|              |       |       |       |        |       |       |
|--------------|-------|-------|-------|--------|-------|-------|
| Mg           | 62.27 | 0.00  | 2.06  | 5.11   | 0.00  | 30.56 |
| Na           | 67.06 | 0.34  | 0.00  | 1.65   | 1.43  | 29.52 |
| K            | 31.00 | 1.47  | 25.45 | 21.20  | 5.82  | 15.07 |
| SO2          | 0.00  | 90.34 | 0.00  | 0.14   | 5.70  | 3.82  |
| TGM          | 7.90  | 0.00  | 0.00  | 0.00   | 81.52 | 10.58 |
| Temperature  | 0.00  | 0.00  | 0.00  | 100.00 | 0.00  | 0.00  |
| CO           | 6.27  | 1.01  | 4.05  | 1.79   | 77.11 | 9.77  |
| Total carbon | 2.74  | 5.79  | 11.30 | 27.31  | 52.87 | 0.00  |

| <b>7 factor sensitivity run</b> | Aged sea-salt | ?     | GEM re-emissions/biomass burning (no Hg) | Sulfate (no Hg) | Fresh sea-salt | Hg pool | Local combustion (no Hg) |
|---------------------------------|---------------|-------|------------------------------------------|-----------------|----------------|---------|--------------------------|
| SO4                             | 25.60         | 0.00  | 0.00                                     | 71.89           | 0.00           | 0.00    | 2.51                     |
| NH4                             | 0.00          | 16.96 | 0.00                                     | 83.04           | 0.00           | 0.00    | 0.00                     |
| Cl                              | 0.00          | 0.34  | 0.00                                     | 0.63            | 91.83          | 7.20    | 0.00                     |
| Ca                              | 0.00          | 94.62 | 0.00                                     | 0.00            | 5.38           | 0.00    | 0.00                     |
| Mg                              | 25.99         | 11.42 | 4.09                                     | 0.62            | 57.88          | 0.00    | 0.00                     |
| Na                              | 28.77         | 0.00  | 3.00                                     | 0.00            | 65.48          | 1.55    | 1.20                     |
| K                               | 11.05         | 19.39 | 17.91                                    | 19.17           | 25.25          | 6.35    | 0.88                     |
| SO2                             | 2.07          | 0.30  | 1.80                                     | 0.54            | 0.47           | 6.24    | 88.58                    |
| TGM                             | 10.09         | 0.01  | 0.00                                     | 0.00            | 3.40           | 86.51   | 0.00                     |
| Temperature                     | 0.00          | 0.00  | 100.00                                   | 0.00            | 0.00           | 0.00    | 0.00                     |
| CO                              | 9.20          | 0.00  | 1.81                                     | 3.86            | 2.12           | 81.95   | 1.06                     |
| Total carbon                    | 0.00          | 0.00  | 27.08                                    | 10.62           | 0.00           | 56.61   | 5.69                     |

SAT

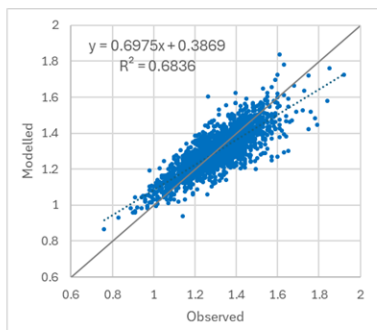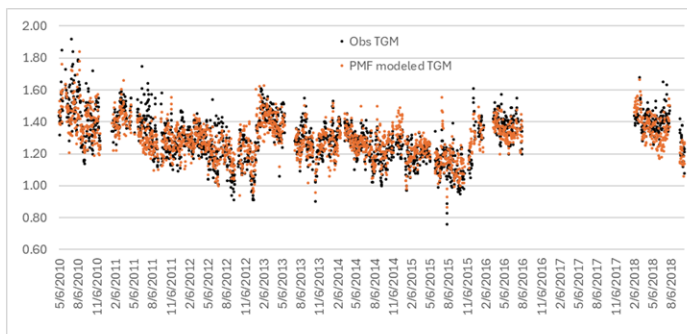

EGB

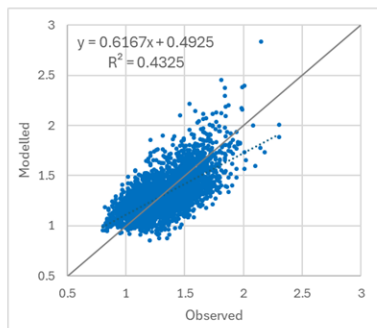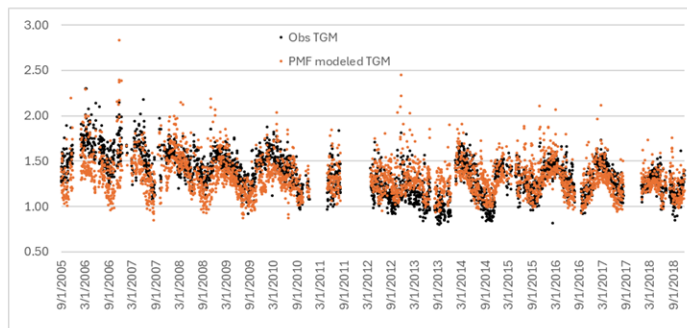

KEJ

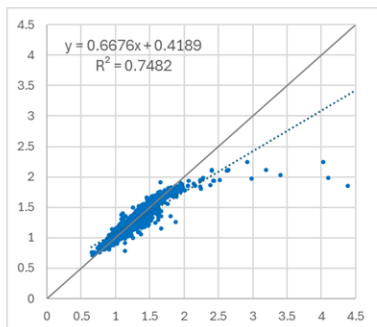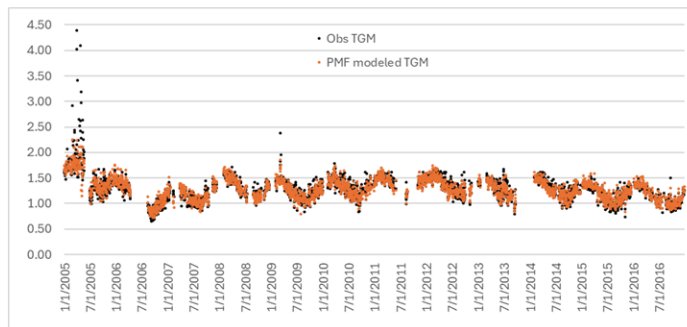

Figure S1: Comparison of PMF modelled and observed 24-h TGM ( $\text{ng m}^{-3}$ ) using regression analysis (left) and time-series analysis (right)

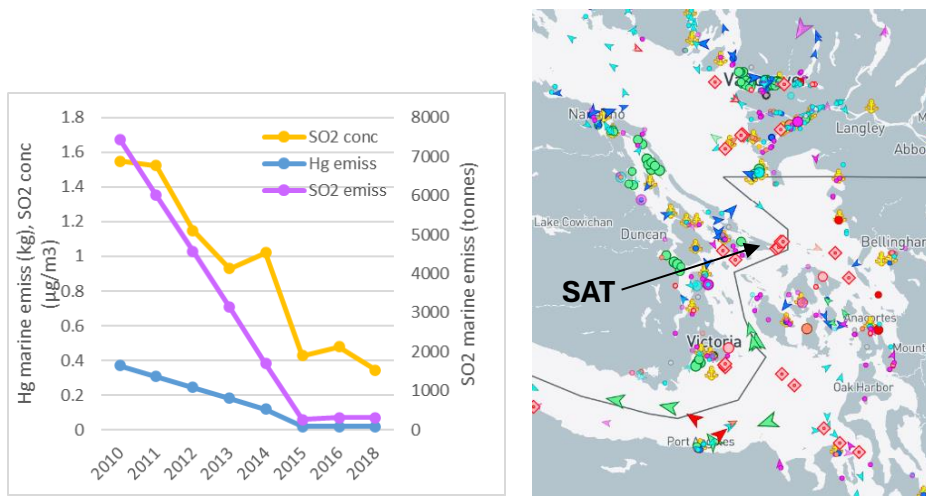

Figure S2: Left - Annual emissions of  $\text{SO}_2$  and Hg from marine transportation reported for British Columbia (ECCC APEI, 2023).  $\text{SO}_2$  ambient concentrations measured at SAT are also plotted. Right – Symbols represent ship traffic along the Strait of Georgia ([http://www.shiptraffic.net/marine-traffic/straits/Strait\\_of\\_Georgia](http://www.shiptraffic.net/marine-traffic/straits/Strait_of_Georgia)).

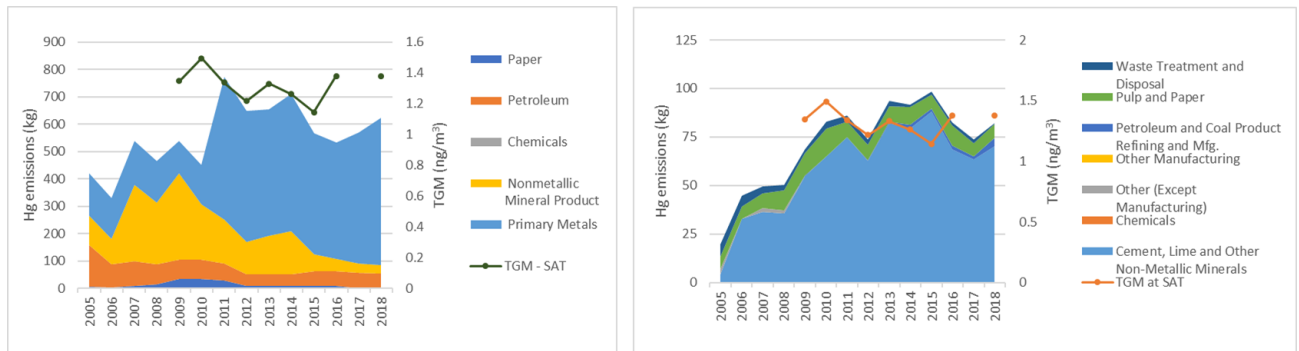

Figure S3: Hg emission sources within 150 km of SAT. Left: Washington State emissions (USEPA TRI, 2023); right: British Columbia emissions (ECCC NPRI, 2023)

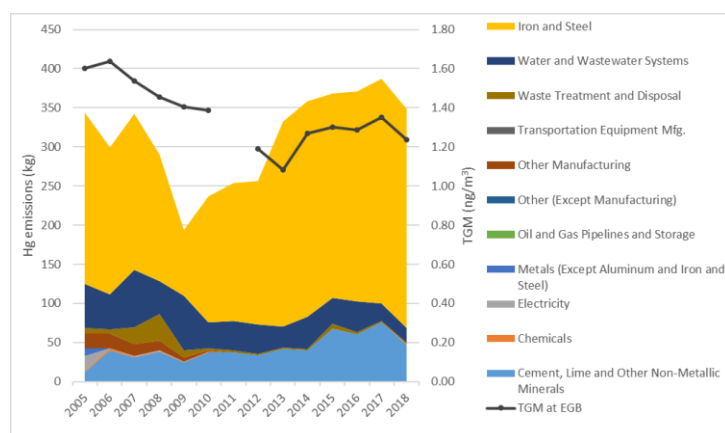

Figure S4: Hg emission sources within 150 km of EGB in Province of Ontario (ECCC NPRI, 2023)

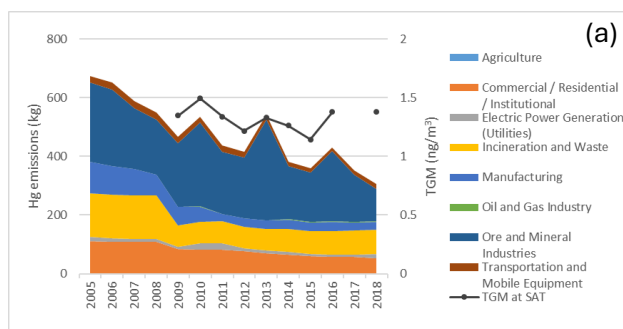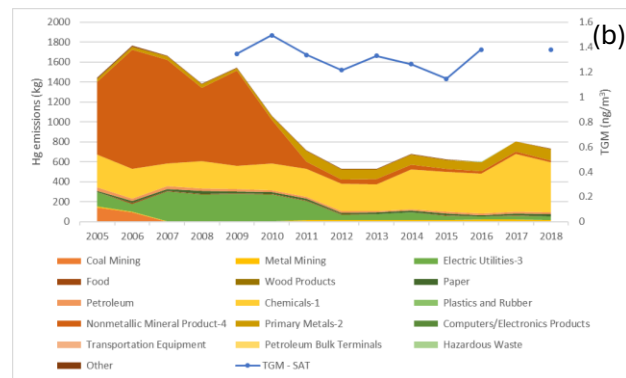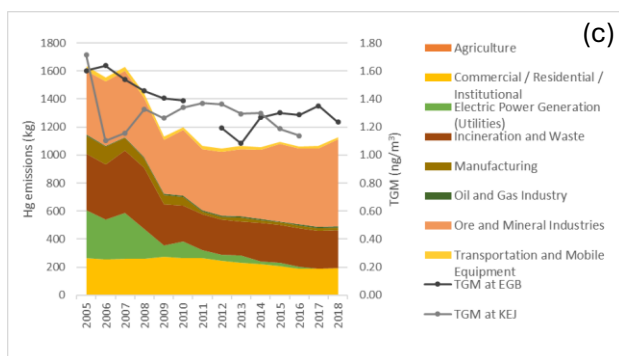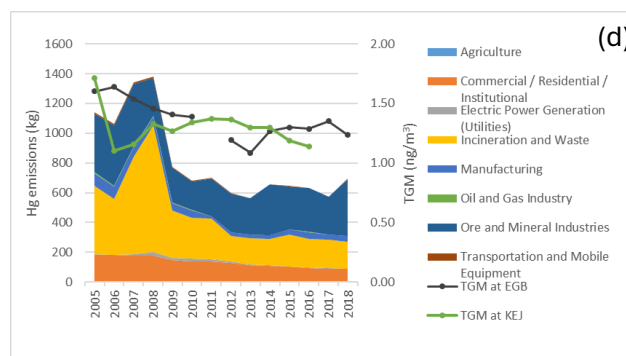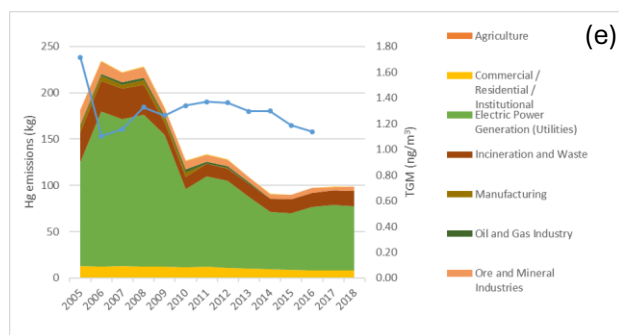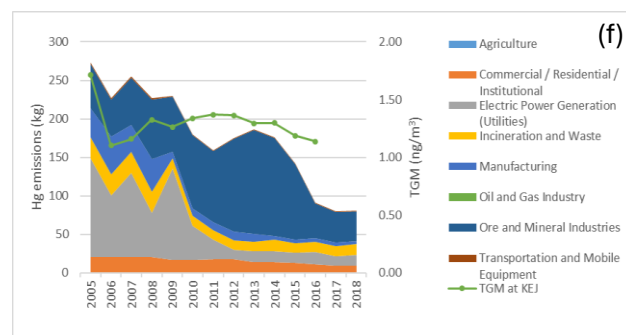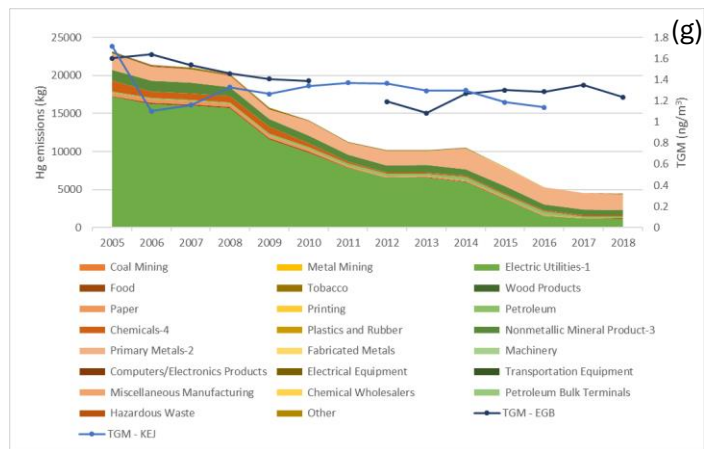

Figure S5: Regional Hg emission sources around SAT, EGB and KEJ. Emissions data for (a) British Columbia, (b) Northwestern U.S., (c) Ontario, (d) Quebec, (e) Nova Scotia, (f) New Brunswick, (g) Northeastern and midwestern U.S. Data sources: ECCC APEI (2023) for Canadian emissions, USEPA TRI (2023) for U.S. emissions.

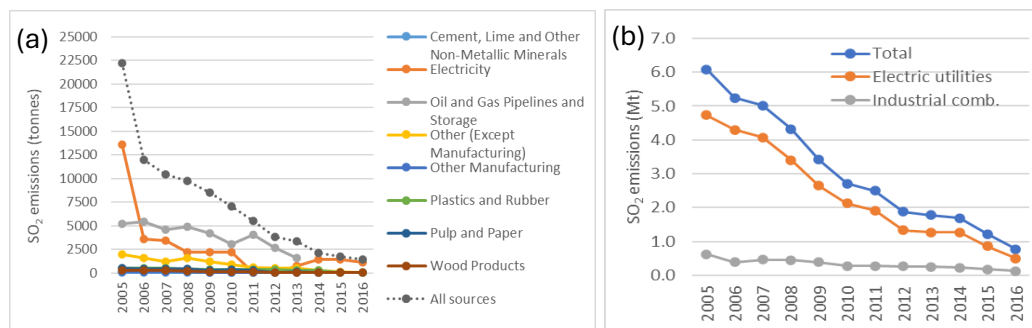

Figure S6: SO<sub>2</sub> emissions (a) local, within 150 km of KEJ (ECCC NPRI, 2023) and (b) regional, U.S. northeast and Midwest regions (USEPA NEI, 2023)

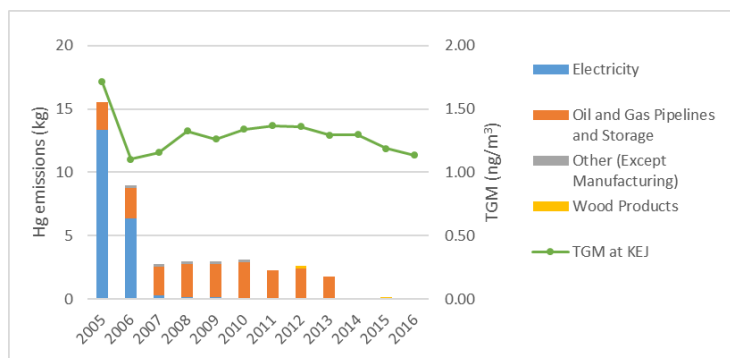

Figure S7: Hg emission sources within 150 km of KEJ in Provinces of Nova Scotia and New Brunswick (ECCC NPRI, 2023)



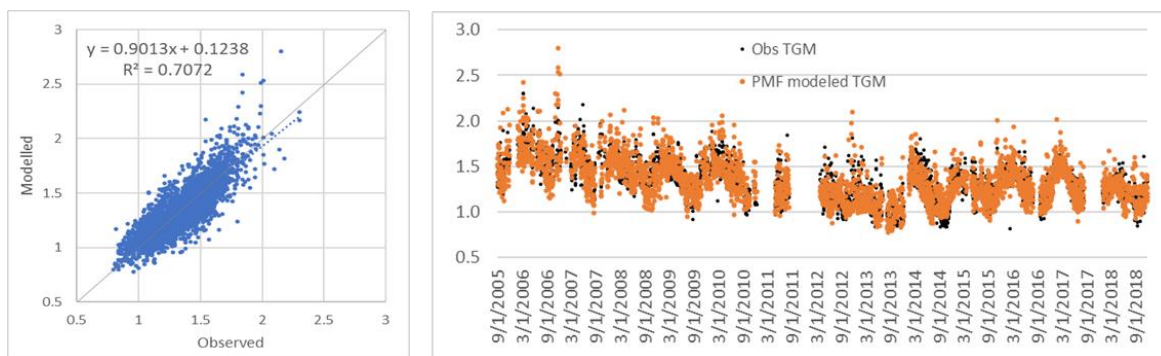

Figure S8: Comparison of PMF modelled and observed 24-h TGM ( $\text{ng m}^{-3}$ ) for EGB using regression analysis (left) and time series analysis (right). PMF modelled TGM are based on yearly runs across the time series.

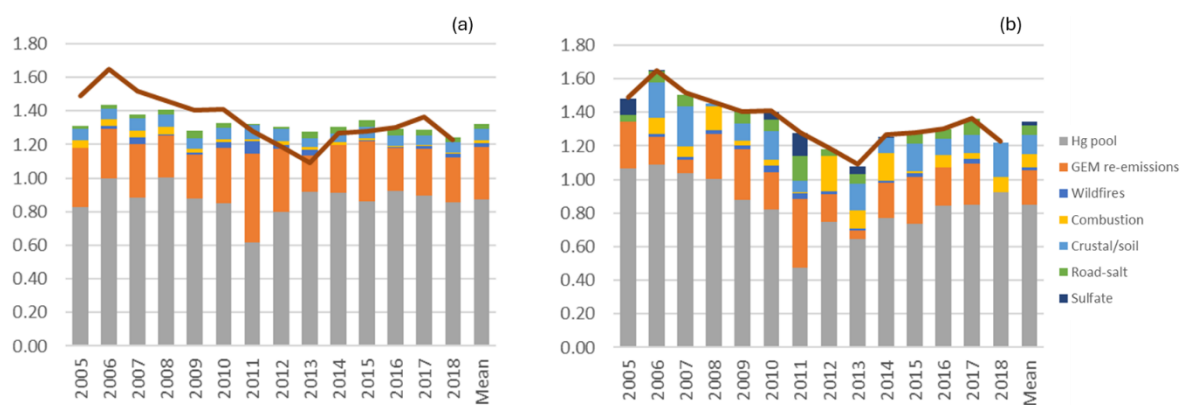

Figure S9: TGM annual source contributions ( $\text{ng m}^{-3}$ ) at EGB for (a) single run and (b) yearly runs for 2005-2018. Bar graphs: PMF modelled TGM; red line: mean observed TGM.

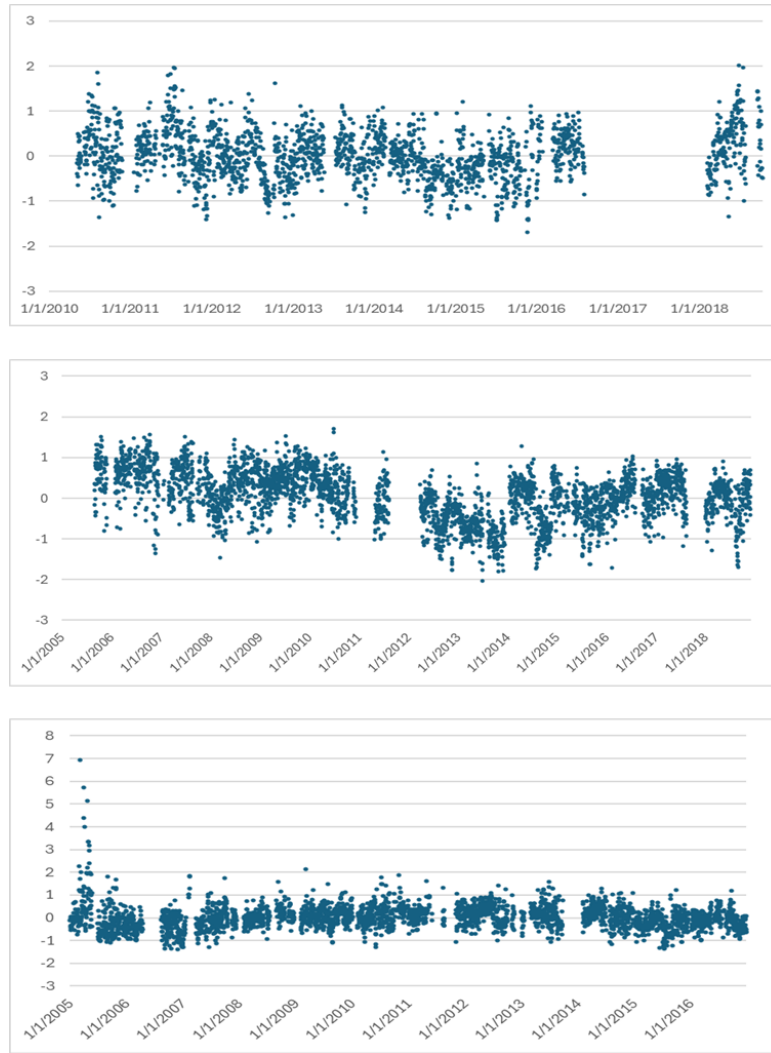

Figure S10: Time series of uncertainty scaled residuals for TGM at SAT (top), EGB (middle), and KEJ (bottom) for the final 6-factor solution

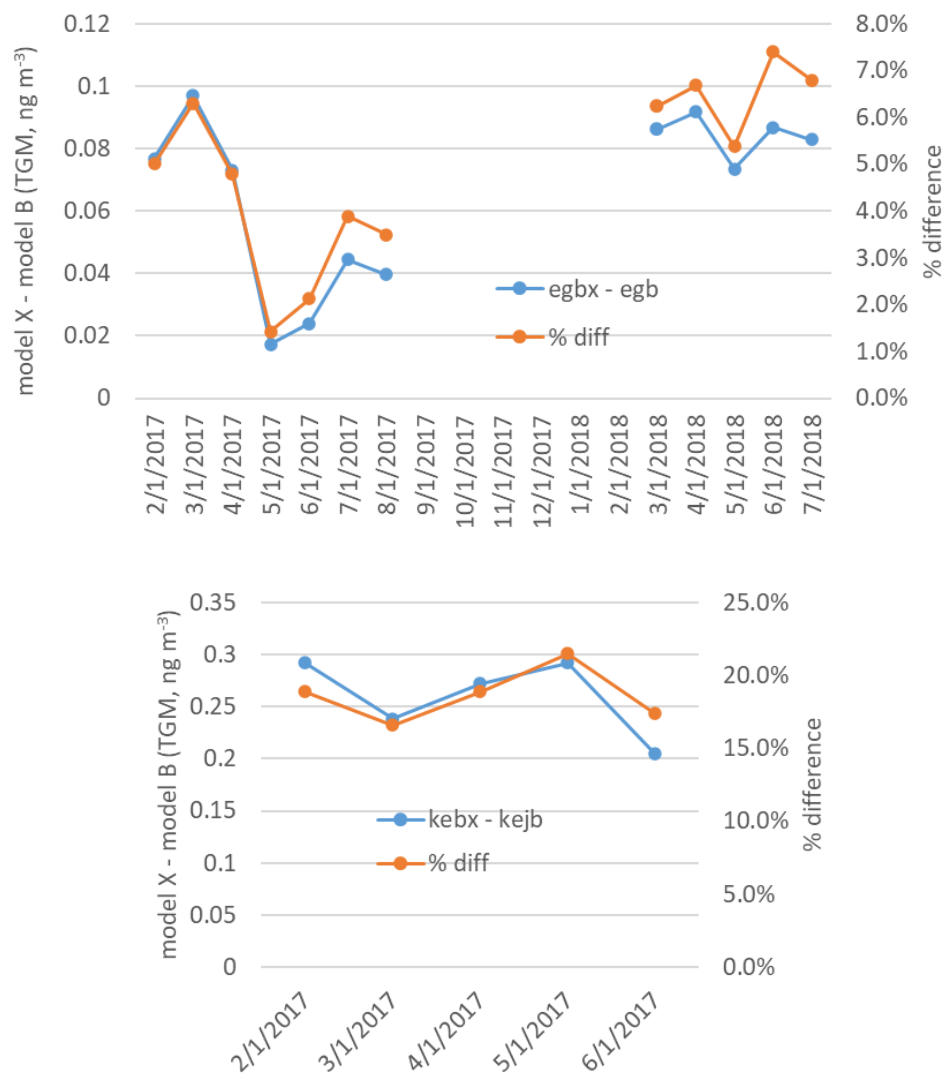

Figure S11: Intercomparison between Tekran model X and B measurements for EGB (top) and KEJ/KEB (bottom). Absolute and relative differences for hourly measurements are plotted.

## Supplement References

Environment and Climate Change Canada (ECCC): Canadian Air and Precipitation Monitoring Network (CAPMoN), Toronto, Ontario, Canada, Data files: AtmosphericGases-TGM-CAPMoN-AllSites-2017.csv, AtmosphericGases-TGM-CAPMoN-AllSites-2018.csv; doi:10.18164/e1df5764-1eec-4a9f-9c03-f515b396b717, 2024.

ECCC APEI: Air Pollutant Emissions Inventory, <https://www.canada.ca/en/environment-climate-change/services/pollutants/air-emissions-inventory-overview.html>, 2023.

ECCC NPRI: National Pollutant Release Inventory, <https://www.canada.ca/en/services/environment/pollution-waste-management/national-pollutant-release-inventory.html>, 2023.

Hopke, P. K., Chen, Y., Rich, D. Q., Mooibroek, D., and Sofowote, U. M.: The application of positive matrix factorization with diagnostics to BIG DATA, Chemometrics and Intelligent Laboratory Systems, 240, 104885, 2023.

USEPA NEI: Air Emissions Inventory, <https://www.epa.gov/air-emissions-inventories>, 2023.

USEPA TRI: Toxics Release Inventory program, <https://www.epa.gov/toxics-release-inventory-tri-program>, 2023.
